# Supplementary material
Source: publisher figshare collection journal article supplement (https://tandf.figshare.com/ndownloader/files/17946923)
Supplement: Supplementary file 1 [file 17946923]

**
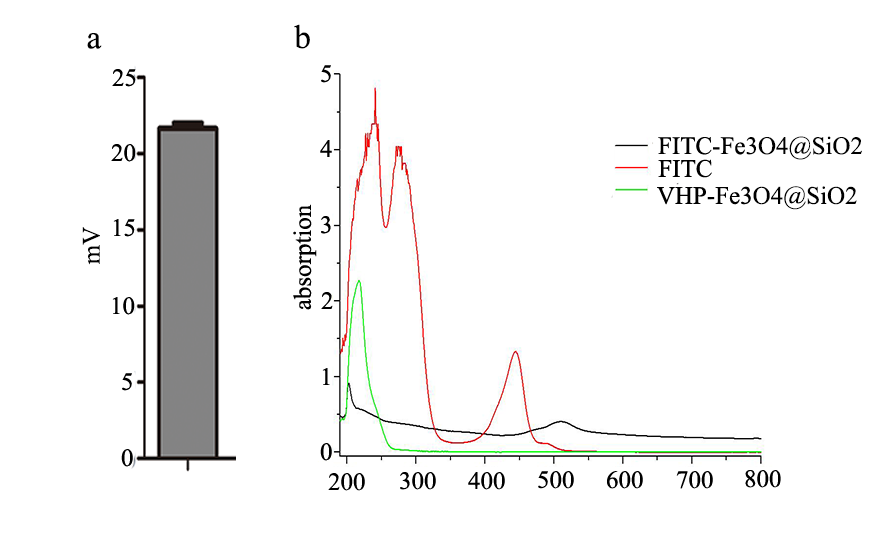
**

**Figure S1: Additional information on FITC-VHP-Fe3O4@SiO2**

(a) DLS results showed that the potential of Fe3O4@SiO2 was approximately +21.6±0.6mv

(b) UV-Vis showed that FITC-VHP-Fe3O4@SiO2 had a wave peak at 220nm.

**
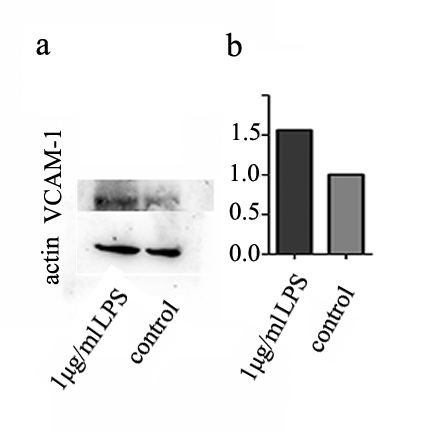
**

**Figure S2: The expression of VCAM-1 in MAECs was increased**

(a)The expression of VCAM-1 before and after LPS stimulation was analyzed by western blot assay.

(b)Protein expression level was quantitatively analyzed by image J software.

**
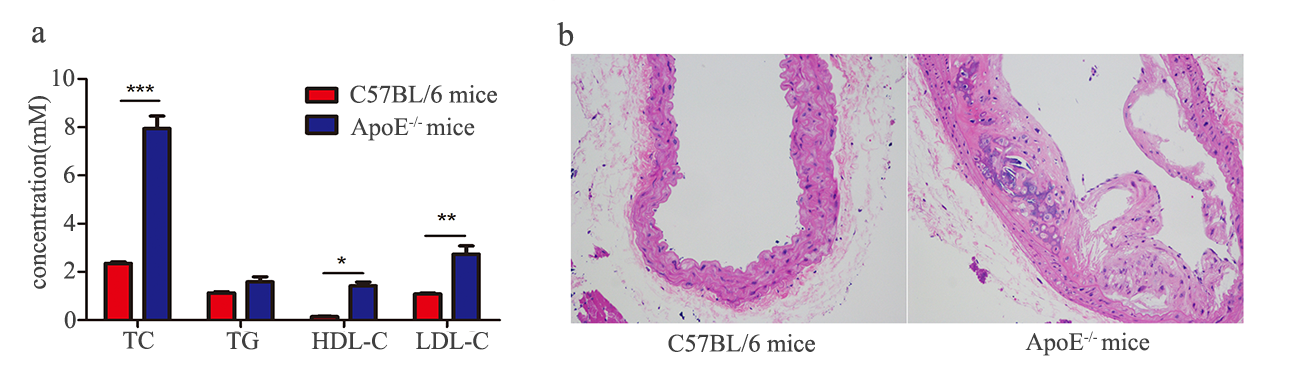
**

**Figure S3 : Establishment of atherosclerosis model**

Blood biochemical indexes(a) and HE staining (b)of C57BL/6 mice fed with normal diet for 20weeks and ApoE-/- mice fed with high cholesterol diet for 20weeks.
